# Supplementary material for: Reference‐based multiple imputation for missing data sensitivity analyses in trial‐based cost‐effectiveness analysis
Source: PubMed Central journal article supplement (PMC7004051; doi:10.1002/hec.3963), 2019-12-17
Supplement: HEC-29-171-s002.pdf [file HEC-29-171-s002.pdf]

```

1
2 *****
3 *** REFERENCE-BASED IMPUTATION OF COST-EFFECTIVENESS DATA ***
4 *****
5
6 *****
7 //Stata program to conduct reference-based multiple imputation with cost-effectiveness data
8 //See accompanying instructions to use this do-file
9
10 * Version: 1.0
11 * Date: 19 December 2018
12 * Author: Baptiste Leurent, LSHTM. Based on mimix.ado by Cro et al. (Stata J. 2016 16(2):443-463)
13 * Stata version: 15
14
15 ** CONTENT:
16 * I - SET-UP
17 * II - DEFINE ROUTINES
18 * III - PREPARE DATA FOR IMPUTATION
19 * IV - RUN MVN
20 * V - MNAR IMPUTATION, FOR EACH ARM AND PATTERN
21 * VI - SAVE AS MI DATASET
22
23 *****
24
25
26 *****
27 *** I - SET-UP ***
28 *****
29 //Define here program parameters (dataset, variable names, imputation method, etc.)
30 //See do-file instructions
31
32 macro drop _all
33
34 ** Parameters **
35
36 * Required
37 global m //Number of imputations
38 global emethod //MAR J2R CIR LMCF BMCF
39 global cmethod //MAR J2R CIR LMCF BMCF
40
41 global data
42 global effectv
43 global costv
44 global covariates
45 global idv
46 global treatv
47 global refgroup
48
49 *Options
50 global interimMAR // effect, cost, or leave blank
51 global restrictto //Restrict MNAR imputation to a specific subgroup (e.g. arm==1). Leave blank
otherwise.
52 global seed //Specify seed for reproducibility. Leave blank for random seed
53 global saving
54
55
56 ** Check parameters
57 //Basic error checks
58
59 if !inlist("$emethod","MAR","J2R","CIR","LMCF","BMCF") | !inlist("$cmethod","MAR","J2R","CIR","LMCF","BMCF") {
60 display as error "Please specify imputation method for effect and cost: MAR J2R CIR LMCF or BMCF"
61 exit
62 }
63 if inlist("$emethod","J2R","CIR","LMCF","BMCF") & inlist("$cmethod","J2R","CIR","LMCF","BMCF") & "$emethod"!=
"$cmethod" {
64 display as error "Different MNAR mechanisms for effect and costs not allowed"
65 exit
66 }
67 if !strpos("$interimMAR", "effect") & !strpos("$interimMAR", "cost") & "$interimMAR"!="" {
68 display as error "'interimMAR' should be 'effect', 'cost', or nothing"
69 exit
70 }
71 if (inlist("$emethod","J2R","CIR") | inlist("$cmethod","J2R","CIR")) & "$refgroup"=="" {
72 display as error "Please specify reference group for CIR or J2R"
73 exit
74 }
75 if "$idv"=="" | "$treatv"=="" {
76 display as error "Please specify treatment arm and patient identifier variables"
77 exit
78 }
79
80
81
82 *****
83 *** II - DEFINE ROUTINES ***
84 *****
85 //Define Mata functions used in imputation step
86
87 mata: mata clear
88
89 ** Mata functions to manipulate list of variables
90 mata

```

```

91 // Common : Returns common elements between 2 vectors
92 real vector common(real vector V1, real vector V2)
93 {
94     st_local("v1",invtokens(strofreall(V1)))
95     st_local("v2",invtokens(strofreall(V2)))
96     stata("local l2: list v1 & v2")
97     res=strtoreal(tokens(st_local("l2")))
98     return(res)
99 }
100 // Join: Returns elements in either of 2 vectors
101 real vector join(real vector V1, real vector V2)
102 {
103     st_local("v1",invtokens(strofreall(V1)))
104     st_local("v2",invtokens(strofreall(V2)))
105     stata("local l2: list v1 | v2")
106     res=sort(strtoreal(tokens(st_local("l2"))),'1)')
107     return(res)
108 }
109 // Exclude: Returns elements of V1, not contained in V2.
110 real vector exclude(real vector V1, real vector V2)
111 {
112     st_local("v1",invtokens(strofreall(V1)))
113     st_local("v2",invtokens(strofreall(V2)))
114     stata("local l2: list v1 - v2")
115     res=sort(strtoreal(tokens(st_local("l2"))),'1)')
116     return(res)
117 }
118 end
119
120 ** Mata function to build conditional covariance matrix
121 //Used for J2R and CIR imputation
122 //Build joint covariance matrix, so that MNAR-missing variables follow distribution from reference arm,
123 conditionally on observed or MAR-missing variables
124 //Parameters = covariance matrix in active arm; covariance in reference arm; indicator of observed or MAR
125 variables; indicator of MNAR-missing variables
126 //See technical details in Appendix
127 mata
128     real matrix condcov(real matrix SigmaA, real matrix SigmaR, real vector vobsmar, real vector vmnar)
129     {
130         A11 = SigmaA[vobsmar,vobsmar] //Decompose var/covar in active and reference arm
131         R11 = SigmaR[vobsmar,vobsmar]
132         R12 = SigmaR[vobsmar,vmnar]
133         R22 = SigmaR[vmnar,vmnar]
134         J11=A11 //Solve constraints (see Appendix)
135         J12=A11*invsym(R11)*R12
136         J22=R22-(R12)'*invsym(R11)*(R11-A11)*invsym(R11)*R12
137         J = J(cols(SigmaA),cols(SigmaA),.) //Build joint covariance matrix
138         J[vobsmar,vobsmar]=J11
139         J[vobsmar,vmnar]=J12
140         J[vmnar,vobsmar]=J12'
141         J[vmnar,vmnar]=J22
142     }
143     return(J)
144 }
145 end
146
147 *****
148 *** III - PREPARE DATA FOR IMPUTATION ***
149 *****
150
151 *** Open original dataset
152 use "$data" , clear
153 describe
154 list in 1/5, noobs
155
156 *** Prepare macros and variables for program
157
158 **Global macros
159 *Seed
160 capture: set seed $seed
161 //Affect random draws in MVN, and imputation steps. Will obtain same draws with same sorted data
162 (and do file)
163 *Outcomes list
164 global responses $effectv $costv
165 *Number of variables
166 global nresp: word count $responses
167 global ncov: word count $covariates
168 global nvar = $nresp + $ncov // "nct" in mimix
169 *Number of treatment group
170 tab $treatv
171 global ntreat = r(r)
172 *First effectiveness and cost variable
173 //Note: in mata, variables order always $effectv $costv $covariates
174 global vleffect=1
175 local neff: word count $effectv
176 global vlcost= `neff' + 1 // Cost var = first after effectiveness vars.
177 *Interim-MAR option
178 if strpos("$interimMAR", "effect") global eintmeth iMAR
179 else global eintmeth $emethod
180 if strpos("$interimMAR", "cost") global cintmeth iMAR
181 else global cintmeth $cmethod

```

```

180     *Check
181     macro list
182
183     ** New variables
184     *Treatment arm variable
185     egen m_treat=group($treatv) //Recoding = 1,2,..
186     tab m_treat
187     *New reference-group code
188     if "$refgroup"!=" " sum m_treat if $treatv==$refgroup
189     global m_refer=r(max)
190     display "New reference arm code = $m_refer"
191     *Observation ID
192     if substr("`type $idv'",1,3)=="str" encode($idv), generate(m id)
193     else gen m id = $idv
194     duplicates report m id
195     *Missing data pattern
196     qui: generate m pattern = 0
197     local i=0
198     foreach var of varlist $responses {
199         local k2 = 2^(`i++') //Will assign a unique number by pattern, for any number of variables.
200         qui: replace m pattern = m pattern + `k2' if `var'== .
201     }
202     tab m pattern m_treat ,m
203     *MNAR subgroup
204     //If restrictto specified, restrict MNAR imputation to these observations
205     gen m_allmar=0
206     if "$restrictto"!=" " replace m_allmar= !($restrictto) // AllMAR=1 if restrictto specified and
observation not in "restrictto" subgroup
207     qui: count if m_allmar==0
208     if "$restrictto"!=" " display "MNAR imputation restricted to `r(N)' observations out of " _N
209     if `r(N)'==0 display as error "No observations MNAR-imputed - Check 'restrictto' option"
210
211     *** Sort and save
212     *Save dataset
213     //Original dataset + programming variables. Will be used to merge with imputed data at the end
214     sort m id
215     compress
216     save "originalext.dta", replace
217
218     *Save reduced version for imputation
219     keep m id m_treat $responses $covariates m pattern m_allmar
220     order m id m_treat $responses $covariates m pattern m_allmar
221     sort m_treat m_pattern m_allmar m id //Sort by treat arm, missing data pattern, then PID.
222     compress
223     save "m d2.dta", replace
224
225
226     *****
227     *** IV - RUN MVN ***
228     *****
229     // Fit a multivariate normal model to the observed data, for each arm
230     // Then draw mean/covariance parameters from their posterior distribution
231
232
233     ** Set-up MCMC burn-in parameters
234     local burnin = 100 //Number of iterations for the initial burn-in period
235     local burnbetween 100 //Number of iterations between imputation
236     local burninM = `burnin' + (($m-1)*`burnbetween') //Total number of iterations
237
238     *** Run MVN for each treatment arm, and save parameters
239     forvalues i = 1/$ntreat {
240         **Set-up
241         use "m d2.dta" if m_treat == `i', clear
242         mi set wide //Wide faster, can set to mlong if size error
243         qui: mi register imputed $responses $covariates
244
245         **MVN
246         display as text "Performing imputation procedure for arm " as result "`i'" as text " of " as result
"$ntreat" as text "..."
247         mi impute mvn $responses $covariates , mcmconly burnin(`burninM') prior(jeffreys) initmcmc(em, iter(
1000)) saveptrace(mimix_parms_a`i', replace)
248         //Note: Used only to fit MVN model and save trace, not doing imputation.
249
250         **Save parameters
251         //Using values from the MCMC trace. Saving every 'burnbetween' iteration is like doing random draws
from from posterior distribution of the parameters
252
253         *Open trace
254         mi ptrace describe mimix_parms_a`i'
255         mi ptrace use mimix_parms_a`i', clear
256
257         *Save every 100 iterations:
258         local burn = `burnin' - 1
259         drop in 1/`burn'
260         keep if !mod( n-1,`burnbetween')
261         generate m_treat = `i'
262         drop m_iter
263         capture mata: mata drop mimix all
264         mata: mimix all= st data( ., .) //Copy dataset (all params, m_treat) into mimix all
265         *Save mean and covariance in matrices, for each m:
266         forvalues k=1/$m {
267             display _n " Draw for group `i', imputation `k' "

```

```

268     *Save mean matrix:
269     mata: mean group`i' imp`k' = mimix_all[`k',1..$nvar]
270     *mata: mean group`i' imp`k'
271     *Save covariance matrices:
272     mata: mata_VAR_group`i'_imp`k'=J($nvar,$nvar,0)
273     local step = $nvar+ 1
274     forvalues r = 1/$nvar {
275         forvalues j = 1/$nvar{
276             if `j' <= `r' {
277                 mata: mata_VAR_group`i'_imp`k'[`r', `j'] = mimix_all[`k', `step']
278                 local step = `step' + 1
279             }
280         }
281     }
282     mata: mata VAR group`i' imp`k' = makesymmetric(mata VAR group`i' imp`k')
283     *mata: mata VAR group`i' imp`k'
284 } //End of saving mean and cov matrices
285
286 } //End of MVN loop.
287
288
289
290 *****
291 *** MNAR IMPUTATION, FOR EACH ARM AND MISSIGN DATA PATTERN ***
292 *****
293
294 **** Set up
295
296 ** Describe data
297 use "m_d2.dta", clear
298 describe
299 tab m pattern m treat,m
300
301 ** Save characteristics of each arm+pattern group
302
303 *First and last observation
304 gen n= n
305 bysort m treat m pattern m allmar: gen nfirst=n[1]
306 bysort m treat m pattern m allmar: gen nlast=n[ N]
307 *Number of missing var
308 egen nmiss=rowmiss($responses $covariates)
309 *Contract
310 contract m treat m pattern m allmar nfirst nlast nmiss
311 rename freq ncount
312 gen groupID= n
313 *Order var and save in a matrix
314 mkmat m treat m pattern m allmar ncount nfirst nlast nmiss groupID , mat(m group)
315 matrix list m_group
316 *Save number of combinations/groups
317 global max_indicator=_N
318
319 ** Indicator of effect/cost/MAR/MNAR variables
320 mata: mata_responses=J(1,0,..)
321 mata: mata_eff=J(1,0,..)
322 mata: mata_cost=J(1,0,..)
323 mata: mata_meth_mar=J(1,0,..)
324 mata: mata_meth_mnar=J(1,0,..)
325 local j=0
326 foreach var in $responses $covariates { //Note: Variables identified by their position, use always
same order
327     local j=`j'+1
328     if strpos("$responses","`var'") mata: mata_responses=(mata_responses,`j')
329     if strpos("$effectv","`var'") mata: mata_eff=(mata_eff,`j')
330     if strpos("$costv","`var'") mata: mata_cost=(mata_cost,`j')
331     if strpos("$effectv","`var'")*("$method"=="MAR") | strpos("$costv","`var'")*("$method"=="MAR") {
332         mata: mata_meth_mar=(mata_meth_mar,`j')
333     }
334     if strpos("$effectv","`var'")*("$method"!="MAR") | strpos("$costv","`var'")*("$method"!="MAR") {
335         mata: mata_meth_mnar=(mata_meth_mnar,`j')
336     }
337 }
338
339
340 ** Empty matrix to save imputed data
341 global new varlist m treat m $responses $covariates m id //List of variables to be saved after each
mata-imputation (used when converting back to Stata)
342 mata: mata_all_new=J(0,$nvar+3,..) // Size= nvar+3(treat,m,ID)
343
344
345 **** Begining of "for each imputation group" loop
346 //Split data in imputation groups (= arm + missing data pattern).
347 //For each group do: 1) Build joint distribution from MAR parameters 2) Draw missing values from that
distribution 3) Redo 1-2 m times.
348 //Note: large loop, encompasses "foreach imputation" loop, see below.
349
350 forvalues i= 1/$max indicator { //For each imputation group
351
352     display _n "---- Imputation for group `i' of $max indicator ----"
353
354     ** Set up
355     //Group charateristics, before going into "for each m" loop.
356

```

```

357 *Save group characteristics
358 matrix list m group
359 local trt grp= m group[`i',1]
360 local pattern = m group[`i',2]
361 local allmar= m_group[`i',3]
362 local ncount= m_group[`i',4]
363 local nfirst= m_group[`i',5]
364 local nlast= m_group[`i',6]
365 local miss_count= m_group[`i',7]
366 local refer = $m_refer //Note: reference arm currently same for everyone, but allow to change if
needed.

367
368 *Indicator of complete/missing var
369 qui: use m d2.dta, clear
370 mata: mata miss = J(1,0,.)
371 mata: mata nonmiss = J(1,0,.)
372 local j=0
373 foreach var of varlist $responses $covariates {
374 local j=`j'+1
375 if (`var'[`nfirst']>=.) mata: mata miss=(mata miss,`j')
376 else mata: mata nonmiss=(mata nonmiss,`j')
377 }
378
379 *Indicator of interim-MAR missing
380 *Last observed cost/effect:
381 mata: st_numscalar("lastobse",rowmax((common(mata_eff,mata_nonmiss),0))) //Adding a 0 so is
"0" if empty matrix
382 mata: st_numscalar("lastobsc",rowmax((common(mata_cost,mata_nonmiss),0))) //Adding a 0 so is
"0" if empty matrix
383 *Testing whether interim (+MAR option specified), for each missing variable:
384 mata: st_local("mislist",invtokens(stofreal(mata_miss)))
385 mata: mata int mar = J(1,0,.)
386 foreach v of local mislist {
387 if (`v'>=$vleffect & `v'<lastobse & "$scintmeth"=="iMAR" ) | (`v'>=$vlcost & `v'<lastobsc
& "$scintmeth"=="iMAR"){
388 mata: mata int mar=(mata int mar,`v')
389 }
390 }
391 *Check
392 mata: mata int mar
393
394 *Indicator of forced-MAR variables
395 //If "restricto" specified, impute all var under MAR for observations not in that subgroup.
396 if `allmar'==1 mata: mata allmar=mata responses
397 else mata: mata allmar=J(1,0,.)
398
399 *Identify MAR-missing variables
400 //Variable is MAR if either i)Main imputation-method for that endpoint = MAR or ii) is
interim-MAR or iii) observation not in "restricto" subgroup
401 //Note: use mata "common" and "join" functions defined above
402 mata: mata_mar2=join(mata_meth_mar,join(mata_int_mar,mata_allmar))
403 mata: mata_marmiss=common(mata_mar2,mata_miss) // MAR and actually missing. Will be those
MAR-imputed for that pattern.
404
405 *Identify MNAR-missing variables
406 //Is MNAR if main imputation method=MNAR, except if i) interim-MAR missing or ii) observation not
in "restricto" subgroup
407 mata: mata_mnar2=exclude(mata_meth_mnar,join(mata_int_mar,mata_allmar))
408 mata: mata_mnarmiss=common(mata_mnar2,mata_miss) // MNAR and actually missing. Will be those
MNAR-imputed for that pattern.
409
410 *Indicator of any MNAR missing variables:
411 mata: st_local("n_mnar_miss",stofreal(cols(mata_mnarmiss)))
412
413 *Check all indicators:
414 display as txt n "Variables imputation status for group `i' (var numbered in order of:
effect,cost,covariates)"
415 display as txt "Observed:"
416 mata: mata_nonmiss
417 display as txt "MAR-missing:"
418 mata: mata_marmiss
419 display as txt "MNAR-missing:"
420 mata: mata_mnarmiss
421
422 *Save observed data
423 //Save responses,covariates,ID in a mata matrix
424 qui: use m d2.dta, clear
425 qui: keep in `nfirst'/'nlast'
426 keep $responses $covariates m id
427 order $responses $covariates m id
428 mata: mata obs= st data( . , .)
429
430
431 *** Begining "for each imputation" loop
432
433 forvalues imp = 1/$m {
434 display "." _cont
435
436 ** If no missing data, copy data directly
437 if `miss_count' == 0 {
438 if `imp'==1 dis "No missing"
439 *Copy observed data

```

```

440   mata: mata new = (J(`ncount',1,`trt grp'), J(`ncount',1, `imp'), mata obs) //Dataset
with Arm + imp number + observed data
441   *Append to existing
442   mata: mata all new = (mata all new \ mata new)
443   }
444
445   ** If missing data, build the joint distribution (mean vector, and covariance matrix)
446   else {
447     *All MAR
448     if `n_mnar_miss'==0 { // No MNAR missing
449       if `imp'==1 dis "Imputation (Method = MAR)"
450       mata: mata Meansv=mean group`trt grp' imp`imp'
451       mata: Sigma = mata VAR group`trt grp' imp`imp'
452     }
453
454     *J2R
effectiveness is J2R
455     if `imp'==1 dis "Imputation (Method = J2R)"
456     *Mean
457     mata: mata Meansv=mean group`trt grp' imp`imp'
458     mata: mata Meansv[1,mata_mnarmiss]=mean group`refer' imp`imp'[1,mata_mnarmiss]
//Replacing Mean from reference group for MNAR variables
459     *Covariance
460     mata: mata nonmiss marmiss=join(mata nonmiss,mata marmiss) //Observed or
MAR-missing variables.
461     mata: Sigma=condcov(mata_VAR_group`trt_grp' imp`imp', mata_VAR_group`refer'
_imp`imp',mata_nonmiss_marmiss,mata_mnarmiss)
462   }
463   *CIR
effectiveness is CIR
464     if `n_mnar_miss'>0) & ("`$method" == "CIR" | "`$cmethod" == "CIR") { //Cost or
465     if `imp'==1 dis "Imputation (Method = CIR)"
466     **Mean
467     mata: mata Meansv=mean group`trt grp' imp`imp'
468     mata: MeansC=mean group`refer' imp`imp'
469     *Effect
470     mata: mata_mnarmiss_e=common(mata_mnarmiss,mata_eff) // Effectiveness
var MNAR-missing
471     mata: st local("vlist",invtokens(strocreal(mata_mnarmiss_e)))
472     foreach v of local vlist {
473       if `v'==`$vleffect` mata: mata Meansv[1,`v'] = MeansC[1,`v'] //If
first var missing, copy from reference arm
474       else mata: mata Meansv[1,`v'] = mata Meansv[1,`v'-1] + (MeansC[1,
`v']-MeansC[1,`v'-1]) //Previous mean (in current arm) + increment in mean in refer group
475     }
476     *Cost
477     mata: mata_mnarmiss_c=common(mata_mnarmiss,mata_cost)
478     mata: st_local("vlist",invtokens(strocreal(mata_mnarmiss_c)))
479     foreach v of local vlist {
480       if `v'==`$vlcost` mata: mata_Meansv[1,`v'] = MeansC[1,`v']
481       else mata: mata_Meansv[1,`v'] = mata_Meansv[1,`v'-1] + (MeansC[1,
`v']-MeansC[1,`v'-1])
482     }
483     **Covariance
484     mata: mata nonmiss marmiss=join(mata nonmiss,mata marmiss) //Observed or
MAR-missing variables.
485     mata: Sigma=condcov(mata_VAR_group`trt_grp' imp`imp', mata VAR_group
`refer' imp`imp',mata nonmiss marmiss,mata_mnarmiss)
486   }
487   *LMCF
effectiveness is LMCF
488     if (`n_mnar_miss'>0) & ("`$method" == "LMCF" | "`$cmethod" == "LMCF") { //Cost or
489     if `imp'==1 dis "Imputation (Method = LMCF)"
490     *Mean
491     mata: mata Meansv=mean group`trt grp' imp`imp'
492     *Effect
493     mata: mata_mnarmiss_e=common(mata_mnarmiss,mata_eff) // Effectiveness
variables MNAR-missing
494     mata: st_local("vlist",invtokens(strocreal(mata_mnarmiss_e)))
495     foreach v of local vlist {
496       if `v'>`$vleffect` { //Note: if first var missing, use the mean
497       previous mean
498       mata: mata_Meansv[1,`v'] = mata_Meansv[1,`v'-1] // Copying
499     }
500     }
501     *Cost
502     mata: mata_mnarmiss_c=common(mata_mnarmiss,mata_cost)
503     mata: st_local("vlist",invtokens(strocreal(mata_mnarmiss_c)))
504     foreach v of local vlist {
505       if `v'>`$vlcost` {
506       mata: mata Meansv[1,`v'] = mata Meansv[1,`v'-1]
507     }
508     }
509     *Covariance
that arm
510     mata: Sigma = mata VAR_group`trt_grp' imp`imp' //Using MAR covariance from
511   }
512   *BMCf
effectiveness is BMCf
513     if `n_mnar_miss'>0) & ("`$method" == "BMCf" | "`$cmethod" == "BMCf") { //Cost or
514     if `imp'==1 dis "Imputation (Method = BMCf)"
515     *Mean

```

```

515     mata: mata Meansv=mean group`trt grp'_imp`imp'
516     *Effect
517     mata: mata mnarmiss e=common(mata mnarmiss,mata eff) // Effectiveness
variables MNAR-missing
518     mata: st_local("vlist",invtokens(stofreal(mata_mnarmiss_e)))
519     foreach v of local vlist {
520     mata: mata_Meansv[1,`v'] = mata_Meansv[1,$vleffect] // Copying mean
of first variable
521     }
522     *Cost
523     mata: mata mnarmiss c=common(mata mnarmiss,mata cost)
524     mata: st_local("vlist",invtokens(stofreal(mata_mnarmiss_c)))
525     foreach v of local vlist {
526     mata: mata_Meansv[1,`v'] = mata_Meansv[1,$vlcost ]
527     }
528     *Covariance
529     mata: Sigma = mata VAR group`trt grp'_imp`imp' //Using MAR covariance from
that arm
530     }
531
532     **Check joint distribution
533     *mata: mata Meansv
534     *mata: Sigma
535
536     ** Perform imputation
537     * Expand mean vector to n observations
538     mata: mata_Means=J(`ncount', 1, mata_Meansv)
539     * Decompose the covariance matrix observed/missing
540     mata: S11 = Sigma[mata_nonmiss, mata_nonmiss] //Covariance observed var.
541     mata: S12 = Sigma[mata_nonmiss, mata_miss] //Covariance for
observed(row)Xmissing(col) var
542     mata: S22 = Sigma[mata_miss, mata_miss] //Covariances missing var
543     *Draw missing values conditionally on observed
544     mata: m1=mata Means[., mata_nonmiss] //Mean param for all observed var (n times)
545     mata: m2=mata Means[., mata_miss] //Mean param for all missing var (n times)
546     mata: raw1=mata_obs[., mata_nonmiss] //Observed values matrix.
547     mata: meanval = m2 + (raw1 - m1)*invsym(S11)*S12 //Expectation given observed values.
548     mata:conds=S22-S12'*invsym(S11)*S12
549     mata: U = cholesky(conds)
550     mata: Z = invnormal(uniform(`ncount',`miss count')) //Drawn n*nmiss standard normal
551     mata: mata_y1 = meanval + Z*U' //Draw n X nmiss following N((cond mean),Covar). =
Imputed values.
552     *Merge all variables
553     mata: mata_new =J(`ncount',$nvar,.) //Empty mat n*nvar
554     mata: mata_new[.,mata_nonmiss] = mata_obs[.,mata_nonmiss] //Add observed val
555     mata: mata_new[.,mata_miss] = mata_y1[.,.] //Add imputed val
556     mata: GI=J(`ncount',1,`trt grp') //Treatment group
557     mata: II=J(`ncount',1,`imp') //Imputation number
558     mata: ID = mata_obs[.,cols(mata_obs)] //Last column of mata_obs = ID
559     mata: mata_new=(GI, II, mata_new, ID)
560     *Append to existing data
561     mata: mata_all_new = (mata_all_new \ mata_new)
562
563     } //End of "if missing" loop.
564
565     } //End of "for m" loop
566
567 } //End of "for each group" loop
568
569
570 *** Check data
571 clear
572 getmata($new varlist)=mata all new
573 describe
574 list in 1/5, header noobs
575 count
576 dis N/$m //Check same number of obs as original dataset
577
578
579 *****
580 ***** SAVE AS MI DATASET *****
581 *****
582
583 *Prepare imputed data
584 clear
585 getmata($new varlist)=mata all new //Convert mata "all new" to Stata
586 keep $responses m m id //Other var will be in original dataset
587 sort m id m
588 tempfile imputedv
589 save `imputedv', replace
590
591 *Add other variables from original dataset
592 use originalext.dta, clear
593 count
594 sort m id
595 merge 1:m m id using `imputedv', nogen update
596 count //OK, N*$m
597
598 *Add m=0 (=observed data)
599 append using originalext.dta
600 replace m=0 if m==.
601

```

```
602 *Convert to MI format
603 mi import flong , m(m) id($idv) clear
604 mi register imputed $responses $covariates
605 mi describe
606 list in 1/5
607
608 *Clean and save
609 describe
610 drop m treat-m //Drop programming var
611 sort $idv _mi_m
612 list in 1/10, sepby($idv)
613 compress
614 label data "Reference-based imputed ($method-$cmethod) - `c(current date)'"
615 save "$saving", replace //! Will overwrite dataset if already exist.
616
617 ** Delete temporary datasets
618 //Temporary datasets created for the program
619 erase originalext.dta
620 erase m d2.dta
621 forvalues i = 1/$ntreat {
622     erase mimix parms a`i'.stptrace
623 }
624
625 ***** END *****
626
627
```
